# Supplementary material for: Controllable removal/release of phosphate by light-responsive layered double hydroxide composite electrode
Source: Research Square preprint supplement (doi:10.21203/rs.3.rs-8667334/v1), 2026-02-02
Supplement: Supplementary file 1 [file 9d0693db20ee04ede6f039a5.docx]

**Supporting Information**

**for**

**Controllable removal/release of phosphate by light-responsive layered double hydroxide composite electrode**

**Da-Wei Huanga†, Kiruthikha Duraisathiamoorthya,b†, Dhanaprabhu Pattappana, Chen-Jie Liaoa, Yu-Jr Changa, Yi-Ting Laia,c,d***

aDepartment of Materials Engineering, Ming Chi University of Technology, New Taipei City, 24301, Taiwan, ROC.

bMaterials Science and Engineering, National Taiwan University of Science and Technology, Taipei City, 106335, Taiwan, ROC.

cBiochemical Technology R&D Center, Ming Chi University of Technology, New Taipei City, 24301, Taiwan, ROC.

dCenter for Plasma and Thin Film Technologies, Ming Chi University of Technology, New Taipei City, 24301, Taiwan, ROC.

**†** These authors contributed equally to this work.

*Corresponding author: Yi-Ting Lai (laieating@mail.mcut.edu.tw)

**Fig S 1**: Linear sweep voltammograms of a single metal salt of 0.1 M Mg(NO3)2 or Mn(NO3)2 at a scan rate of 25 mV/s.


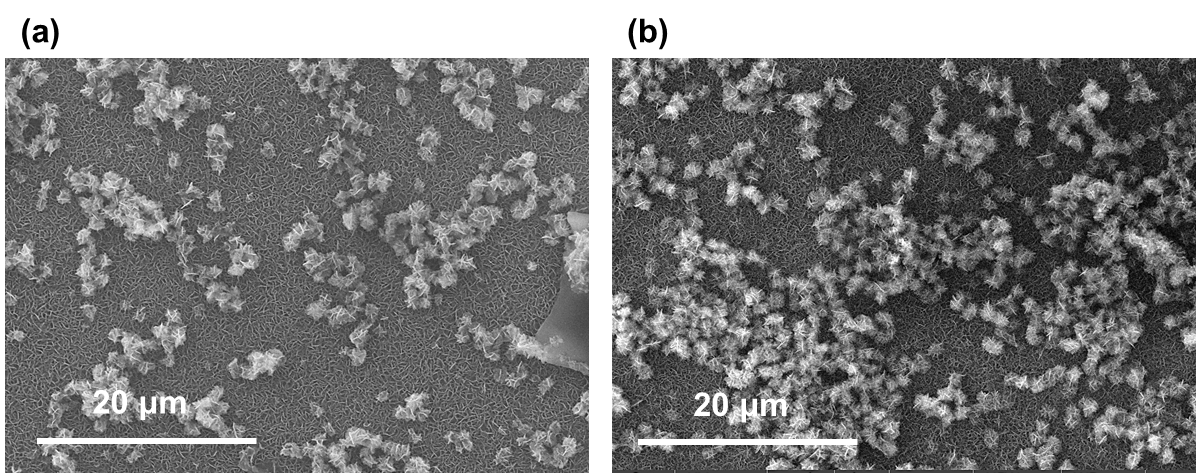


**Fig S 2**: The electrochemical *in situ* growth of MgMn-LDH using (a) constant voltammetry method and (b) pulse voltammetry method.


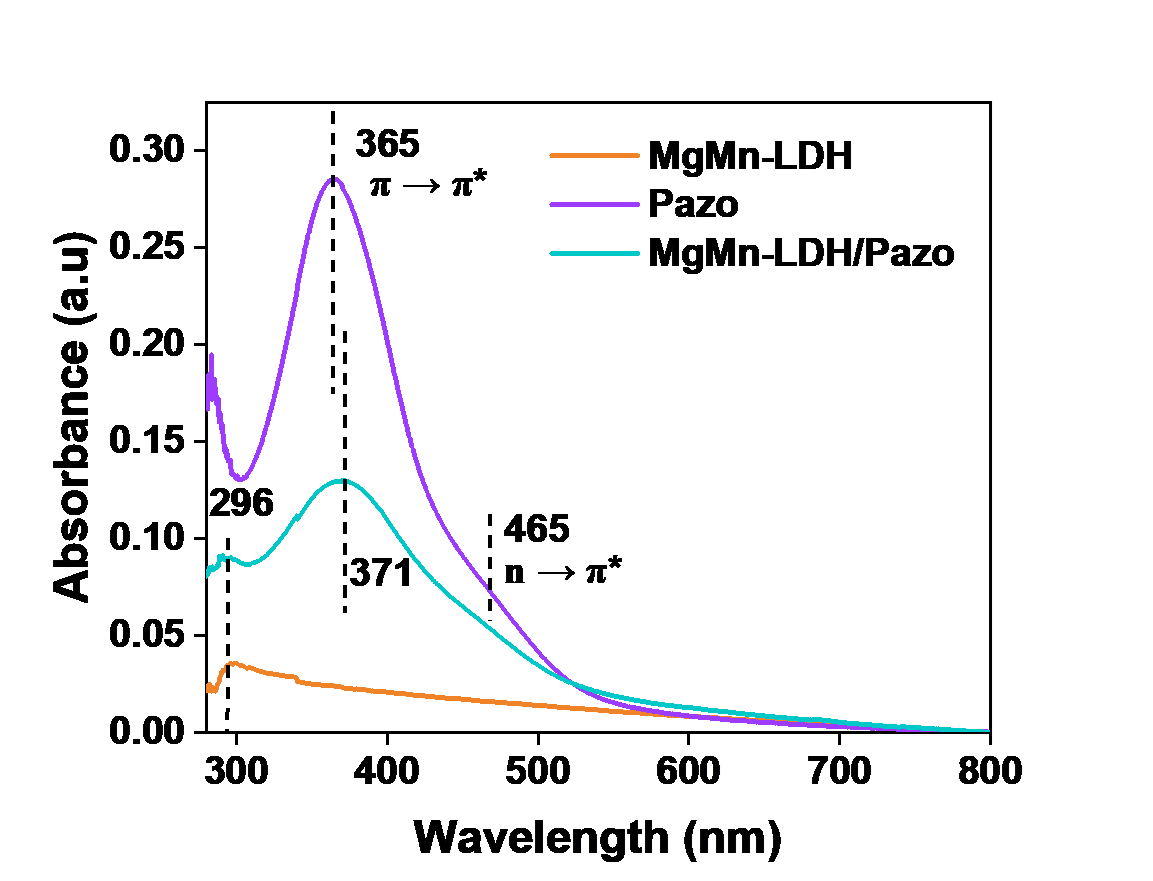


**Fig S 3**: UV-Vis absorption spectra of MgMn-LDH, Pazo, and MgMn-LDH/Pazo films.


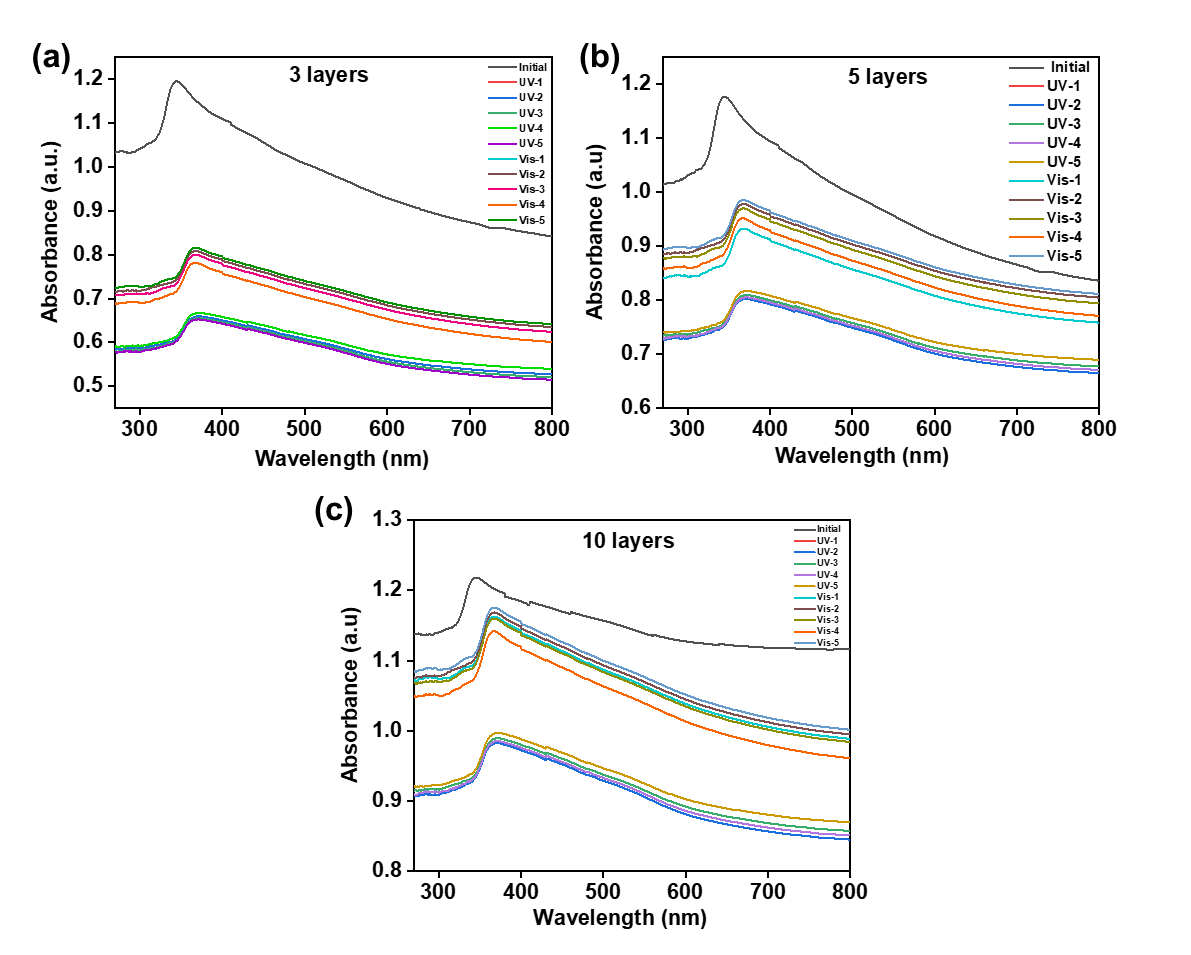


**Fig S 4**: UV-visible absorption spectra of multilayer films of MgMn-LDH/Pazo under alternating UV (365 nm) and visible light exposure: (a) 3 layers, (b) 5 layers, and (c) 10 layers.


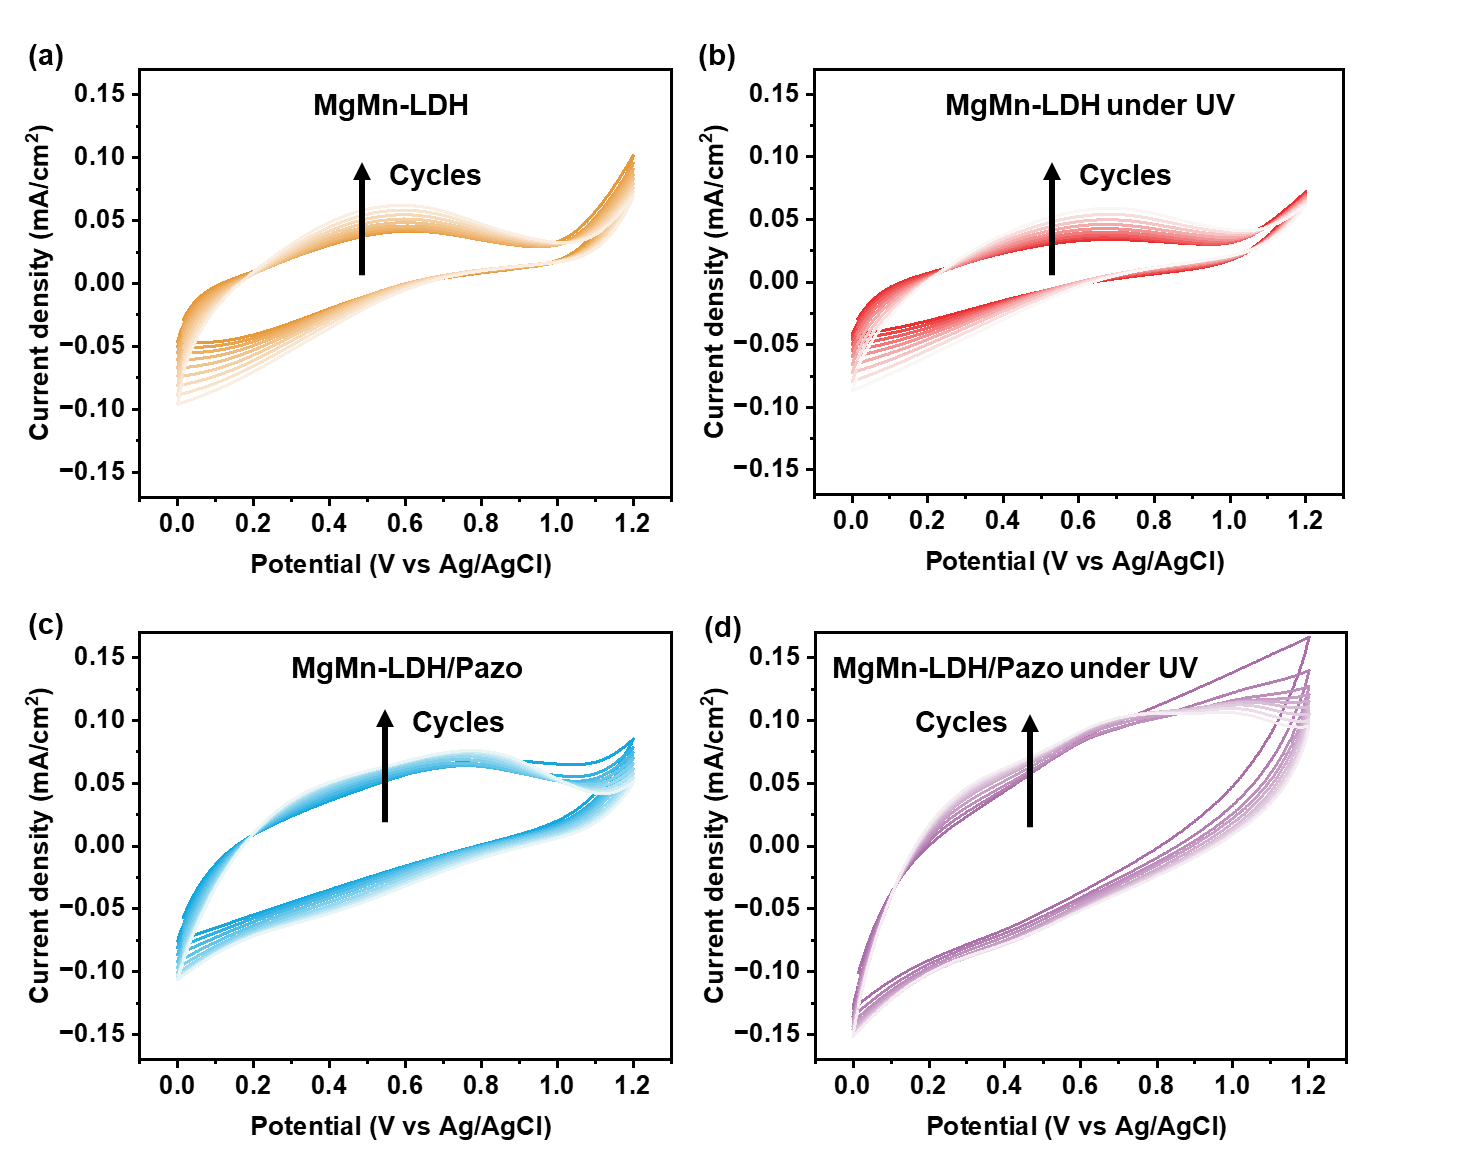


**Fig S 5**: The CV cycles of electrodeposited films with/without UV irradiation: (a) MgMn-LDH, (b) MgMn-LDH under UV irradiation, (c) MgMn-LDH/Pazo, and (d) MgMn-LDH/Pazo under UV irradiation.
