# Supplementary material for: Controllable removal/release of phosphate by light-responsive layered double hydroxide composite electrode
Source: Research Square preprint supplement (doi:10.21203/rs.3.rs-8667334/v1), 2026-02-02
Supplement: Supplementary file 2 [file c43960f8d5f7a31869c6bb71.docx]

**Supporting Information**

**for**

**Controllable removal/release of phosphate by light-responsive layered double hydroxide composite electrode**

**Figure S 1**. Linear sweep voltammograms of a single metal salt of 0.1 M Mg(NO3)2 or Mn(NO3)2 at a scan rate of 25 mV/s.


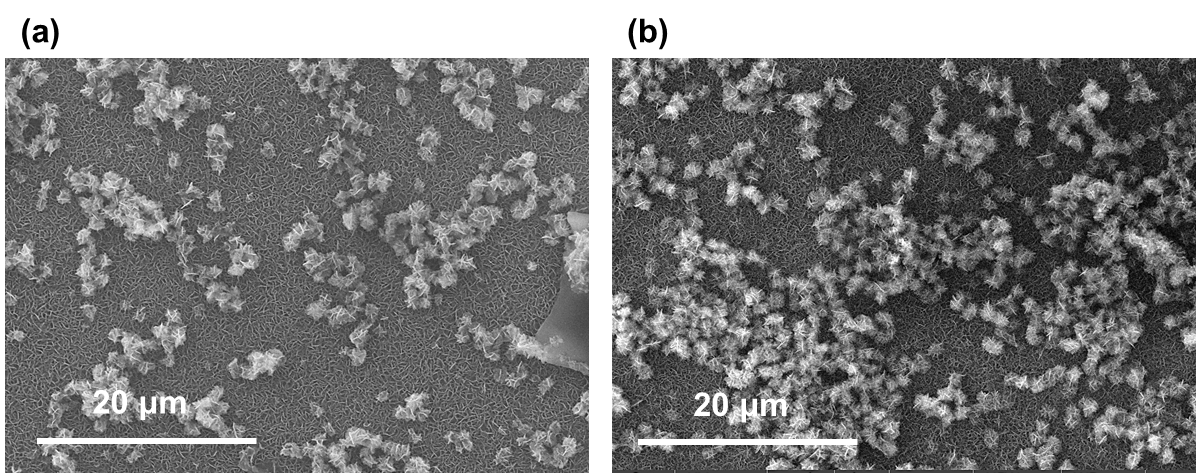


**Figure S 2**. The electrochemical *in situ* growth of MgMn-LDH using (a) constant voltammetry method and (b) pulse voltammetry method.


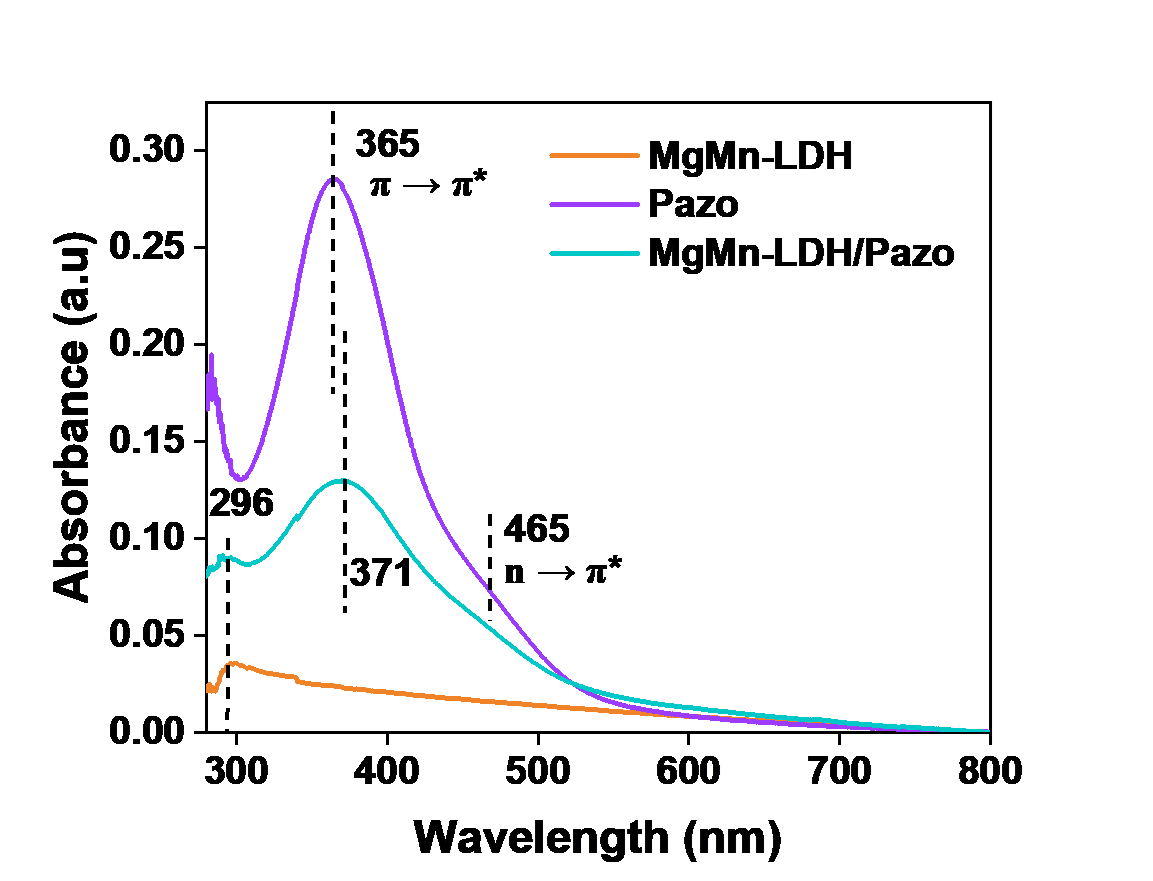


**Figure S 3**. UV-Vis absorption spectra of MgMn-LDH, Pazo, and MgMn-LDH/Pazo films.


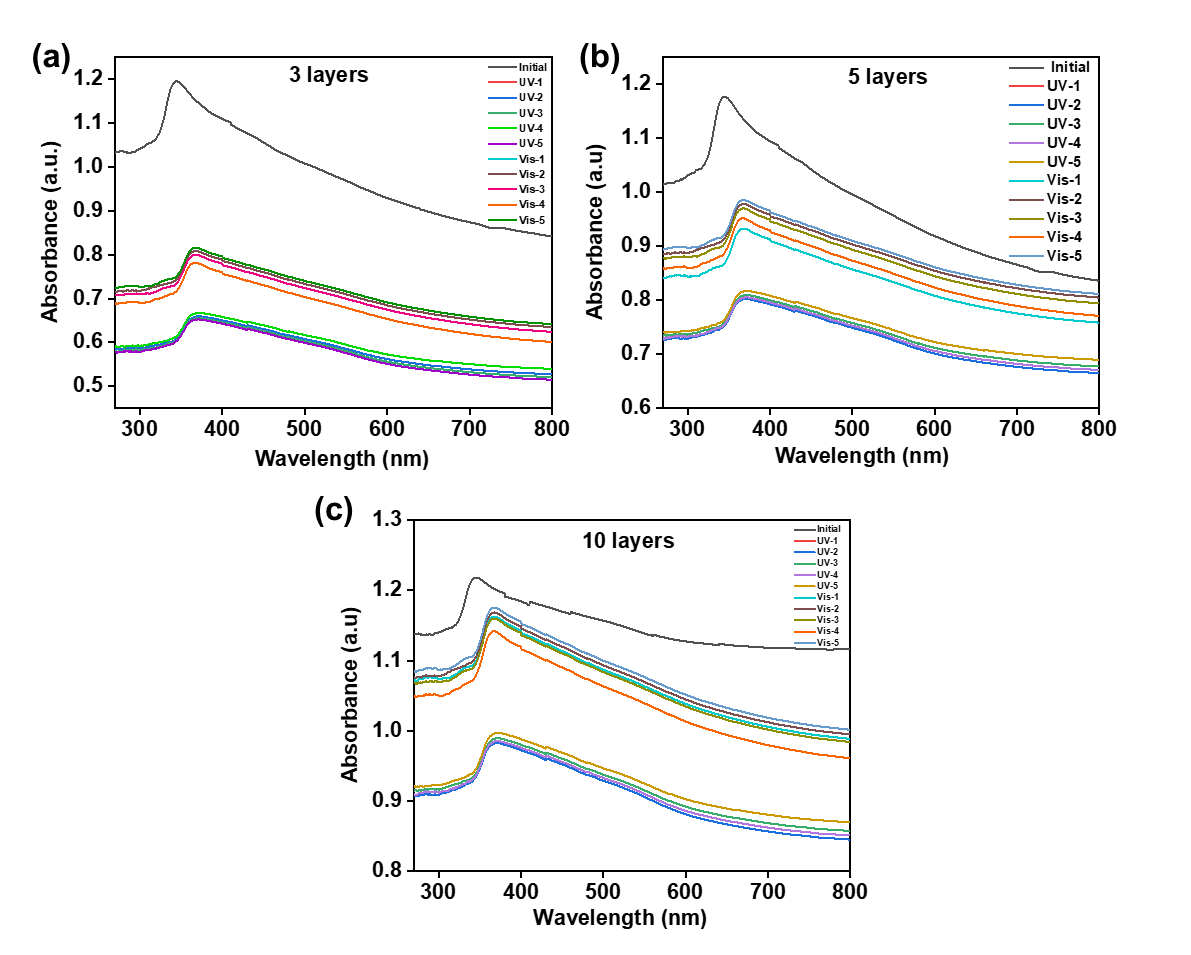


**Figure S 4**. UV-visible absorption spectra of multilayer films of MgMn-LDH/Pazo under alternating UV (365 nm) and visible light exposure: (a) 3 layers, (b) 5 layers, and (c) 10 layers.


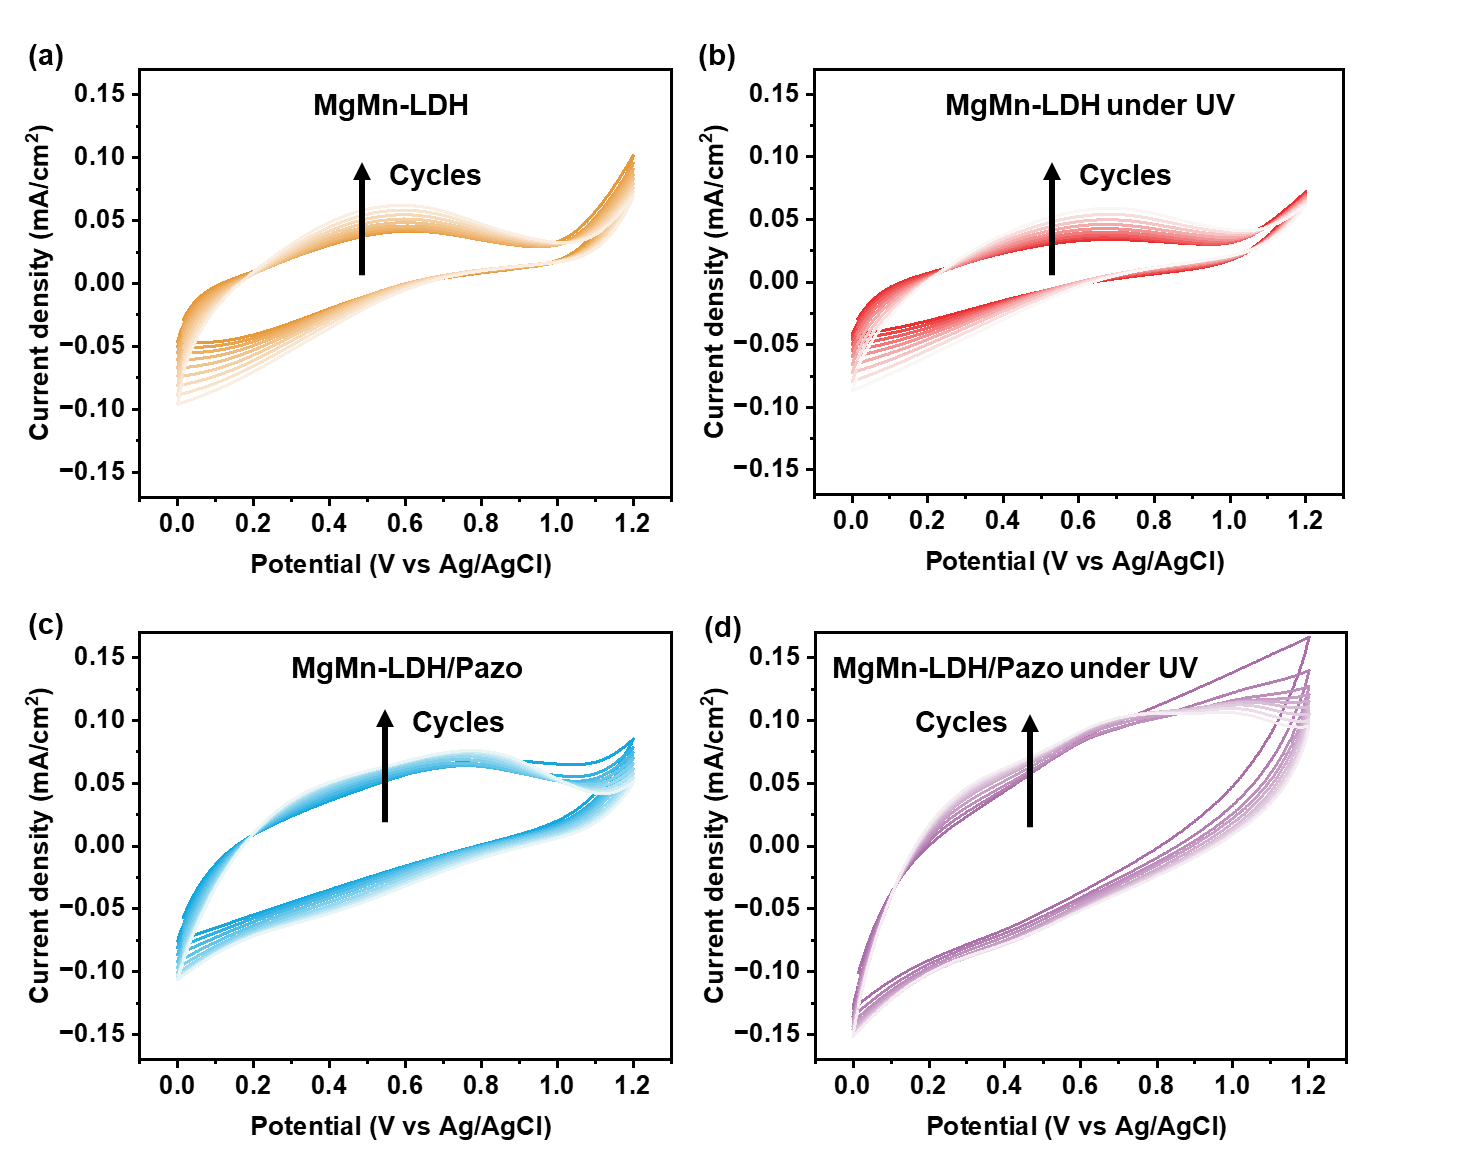


**Figure S 5.** The CV cycles of electrodeposited films with/without UV irradiation: (a) MgMn-LDH, (b) MgMn-LDH under UV irradiation, (c) MgMn-LDH/Pazo, and (d) MgMn-LDH/Pazo under UV irradiation.
